# Supplementary material for: Notes on the Biology of the Cixiid PlanthopperCixius meridionalis(Hemiptera: Fulgoroidea)
Source: Hindawi journal article supplement (doi:10.1155/2014/769021), 2014-01-01
Supplement: f1 [file 769021.f1.xlsx]

## Sheet: 2013-09-27-1152_Cixius_records
Catalog Number	Catalog Number	DOI	DOI	Locality	Latitude	Longitude	Coordinate Accuracy (m)	Collecting Date	Method	Sex	Age Classes	Remarks
KNWR:Ento:8917	KNWR:Ento:8917	10.7299/X72807QZ	10.7299/X72807QZ	Soldotna, black spruce/shrub wetland 0.5 km S of Funny R. Rd. just E of Ski Hill Rd.	60.47	-151.081	100	2008-05-03	Berlese		5th instar
KNWR:Ento:8877	KNWR:Ento:8877	10.7299/X7BR8SB0	10.7299/X7BR8SB0	Soldotna. Headquarters Lake. Spruce muskeg on southwest shore.	60.4607	-151.077	4	2013-05-28			5th instar , 4th instar
KNWR:Ento:8881	KNWR:Ento:8881	10.7299/X77081KH	10.7299/X77081KH	Soldotna. Headquarters Lake. Black spruce muskeg on SW shore of lake.	60.461	-151.077	50	2013-06-05			5th instar , 4th instar , 3rd instar
KNWR:Ento:8883	KNWR:Ento:8883	10.7299/X73778VS	10.7299/X73778VS	Soldotna. Headquarters Lake. Wetland on SW shore of lake.	60.4601	-151.077	7	2013-06-07			4th instar , 3rd instar , 1st instar , 2nd instar
KNWR:Ento:8894	KNWR:Ento:8894	10.7299/X7ZG6SCH	10.7299/X7ZG6SCH	Soldotna. Headquarters Lake. Edge of fen on west shore of lake.	60.4647	-151.068	6	2013-06-12	hand		4th instar
KNWR:Ento:8899	KNWR:Ento:8899	10.7299/X7TQ61PM	10.7299/X7TQ61PM	Soldotna. Headquarters Lake. muskeg on SW shore of lake.	60.4602	-151.077	10	2013-06-13			5th instar , 4th instar
KNWR:Ento:8902	KNWR:Ento:8902	10.7299/X7Q240CX	10.7299/X7Q240CX	Soldotna. Headquarters Lake. Wetland on SW shore of lake.	60.4611	-151.076	7	2013-06-20	hand		5th instar
KNWR:Ento:8903	KNWR:Ento:8903	10.7299/X7K937PN	10.7299/X7K937PN	Soldotna. Headquarters Lake. Wetland on SW shore of lake.	60.4611	-151.076	7	2013-06-20	hand		5th instar
KNWR:Ento:8904	KNWR:Ento:8904	10.7299/X7FJ2GXG	10.7299/X7FJ2GXG	Soldotna. Headquarters Lake. Wetland on SW shore of lake.	60.4611	-151.076	7	2013-06-20	hand		5th instar , 4th instar
KNWR:Ento:8912	KNWR:Ento:8912	10.7299/X79S1R5Q	10.7299/X79S1R5Q	Soldotna. Headquarters Lake.	60.4606	-151.077	6	2013-06-24	hand		5th instar
KNWR:Ento:8913	KNWR:Ento:8913	10.7299/X7CJ8DM8	10.7299/X7CJ8DM8	Soldotna. Headquarters Lake.	60.4595	-151.077	9	2013-06-25	hand		5th instar , 4th instar , 3rd instar
KNWR:Ento:8914	KNWR:Ento:8914	10.7299/X7416X60	10.7299/X7416X60	Soldotna. Pond near Headquarters Lake.	60.4652	-151.066	8	2013-06-26	hand		5th instar , 4th instar , 3rd instar , 2nd instar
KNWR:Ento:8916	KNWR:Ento:8916	10.7299/X76110FP	10.7299/X76110FP	Wetland off of the Centennial Trail	60.465	-151.062	6	2013-06-27			5th instar , 4th instar
KNWR:Ento:8918	KNWR:Ento:8918	10.7299/X7XG9R8K	10.7299/X7XG9R8K	Kasilof, Kalifornsky Beach Road. Well-drained black spruce forest opposite Old Kasilof Road.	60.3646	-151.261	8	2013-06-28			5th instar
KNWR:Ento:8925	KNWR:Ento:8925	10.7299/X7513Z9X	10.7299/X7513Z9X	Soldotna, Headquarters Lake	60.4603	-151.077	9	2013-07-02		male	adult	5th instar nymph collected on July 2, kept alive in a ziploc bag on Sphagnum and a sapling Picea mariana. Adult emerged between 4:30pm on July 9 and 4:30pm on July 10.
KNWR:Ento:8920	KNWR:Ento:8920	10.7299/X7ST7PZ5	10.7299/X7ST7PZ5	Soldotna, Headquarters Lake.	60.46	-151.077	7	2013-07-08			5th instar , 1st instar , 4th instar , 3rd instar
KNWR:Ento:8921	KNWR:Ento:8921	10.7299/X7P26Z8M	10.7299/X7P26Z8M	Soldotna, Headquarters Lake.	60.46	-151.077	7	2013-07-08		male	adult
KNWR:Ento:8922	KNWR:Ento:8922	10.7299/X7J966HT	10.7299/X7J966HT	Soldotna, Headquarters Lake.	60.46	-151.077	60	2013-07-08	sweep	male	adult
KNWR:Ento:8926	KNWR:Ento:8926	10.7299/X71836M1	10.7299/X71836M1	Soldotna, Headquarters Lake.	60.46	-151.077	7	2013-07-08	hand	male	adult	Nymphs collected on 8.July.2013 and kept in vial containing Sphagnum moss. Adult had eclosed between 4:30pm on 10.July.2013 and 8:30am on 11.July.2013.
KNWR:Ento:8932	KNWR:Ento:8932	10.7299/X7DF6RBB	10.7299/X7DF6RBB	Soldotna, Headquarters Lake.	60.46	-151.077	7	2013-07-08		female	adult	Nymphs collected on 8.July.2013 and kept in vial containing Sphagnum moss. Adult had eclosed between 12.July.2013 and 13:00 on 15.July.2013.
KNWR:Ento:8923	KNWR:Ento:8923	10.7299/X7DJ5FRN	10.7299/X7DJ5FRN	Soldotna, Headquarters Lake	60.4605	-151.077	20	2013-07-09	sweep	male	adult
KNWR:Ento:8924	KNWR:Ento:8924	10.7299/X78S4Q1B	10.7299/X78S4Q1B	Soldotna, Headquarters Lake	60.46	-151.077	16	2013-07-09	sweep	male	adult
KNWR:Ento:10254	KNWR:Ento:10254	10.7299/X7J38SQ7	10.7299/X7J38SQ7	Soldotna, Headquarters Lake wetland	60.4651	-151.066	60	2013-07-12	sweep	female	adult
KNWR:Ento:10255	KNWR:Ento:10255	10.7299/X7GB245Q	10.7299/X7GB245Q	Soldotna, Headquarters Lake wetland	60.4651	-151.066	60	2013-07-12	sweep	female	adult
KNWR:Ento:10256	KNWR:Ento:10256	10.7299/X7NV9JCR	10.7299/X7NV9JCR	Soldotna, Headquarters Lake wetland	60.4651	-151.066	60	2013-07-12	sweep	male	adult
KNWR:Ento:10257	KNWR:Ento:10257	10.7299/X7H995B0	10.7299/X7H995B0	Soldotna, Headquarters Lake wetland	60.465	-151.064	7	2013-07-12	hand		4th instar
KNWR:Ento:10258	KNWR:Ento:10258	10.7299/X7BK1CGF	10.7299/X7BK1CGF	Soldotna, Headquarters Lake wetland	60.465	-151.064	7	2013-07-12	hand		4th instar
KNWR:Ento:10277	KNWR:Ento:10277	10.7299/X7251JB3	10.7299/X7251JB3	Soldotna, Headquarters Lake wetland	60.465	-151.064	7	2013-07-15	hand	male	adult
KNWR:Ento:10279	KNWR:Ento:10279	10.7299/X7BG2P5G	10.7299/X7BG2P5G	Soldotna, Headquarters Lake wetland	60.465	-151.064	7	2013-07-15	hand		5th instar , 2nd instar , 4th instar
KNWR:Ento:10281	KNWR:Ento:10281	10.7299/X7XD11TB	10.7299/X7XD11TB	Soldotna, Headquarters Lake wetland	60.465	-151.064	7	2013-07-15		female	adult
KNWR:Ento:10282	KNWR:Ento:10282	10.7299/X7K35TR8	10.7299/X7K35TR8	Soldotna, Headquarters Lake wetland	60.465	-151.064	7	2013-07-15		male	adult
KNWR:Ento:10289	KNWR:Ento:10289	10.7299/X7M32VWN	10.7299/X7M32VWN	Soldotna, Headquarters Lake wetland	60.4652	-151.065	8	2013-07-19	hand, aspirator		5th instar , 4th instar , 3rd instar
KNWR:Ento:10290	KNWR:Ento:10290	10.7299/X7G73DWS	10.7299/X7G73DWS	Soldotna, Headquarters Lake wetland	60.4652	-151.065	8	2013-07-19	hand, aspirator	female	adult
KNWR:Ento:10291	KNWR:Ento:10291	10.7299/X74X57Z5	10.7299/X74X57Z5	Soldotna, Headquarters Lake wetland	60.4652	-151.065	8	2013-07-19	hand	male	adult
KNWR:Ento:8933	KNWR:Ento:8933	10.7299/X7MW2H9T	10.7299/X7MW2H9T	Soldotna, Headquarters Lake wetland	60.4652	-151.065	60	2013-07-19	sweep	male	adult
KNWR:Ento:8934	KNWR:Ento:8934	10.7299/X76T0MS5	10.7299/X76T0MS5	Soldotna, Headquarters Lake wetland	60.4652	-151.066	60	2013-07-19	sweep	female	adult
KNWR:Ento:10292	KNWR:Ento:10292	10.7299/X75X292H	10.7299/X75X292H	Soldotna, Headquarters Lake wetland	60.4655	-151.065	60	2013-07-22	sweep	female	adult
KNWR:Ento:10293	KNWR:Ento:10293	10.7299/X7RN3803	10.7299/X7RN3803	Soldotna, Headquarters Lake wetland	60.4655	-151.065	60	2013-07-22	sweep	female	adult
KNWR:Ento:10294	KNWR:Ento:10294	10.7299/X7057G2B	10.7299/X7057G2B	Soldotna, Headquarters Lake wetland	60.4655	-151.065	60	2013-07-22	sweep	female	adult
KNWR:Ento:8940	KNWR:Ento:8940	10.7299/X77S7NWJ	10.7299/X77S7NWJ	Soldotna, Headquarters Lake	60.46	-151.077	5	2013-07-31	Berlese		3rd instar , 2nd instar
KNWR:Ento:8941	KNWR:Ento:8941	10.7299/X7WD40QD	10.7299/X7WD40QD	Soldotna, Headquarters Lake	60.46	-151.077	6	2013-07-31	Berlese		5th instar
KNWR:Ento:8942	KNWR:Ento:8942	10.7299/X7N29X3S	10.7299/X7N29X3S	Soldotna, Headquarters Lake	60.46	-151.077	6	2013-07-31	hand		5th instar
KNWR:Ento:10319	KNWR:Ento:10319	10.7299/X73X86SB	10.7299/X73X86SB	Soldotna, Headquarters Lake	60.4602	-151.079	7	2013-08-07	Berlese		3rd instar , 1st instar
KNWR:Ento:10320	KNWR:Ento:10320	10.7299/X7TM7B7V	10.7299/X7TM7B7V	Soldotna, Headquarters Lake	60.4602	-151.079	9	2013-08-07	hand		5th instar , 3rd instar , 4th instar
KNWR:Ento:10321	KNWR:Ento:10321	10.7299/X7ZC8301	10.7299/X7ZC8301	Soldotna, Headquarters Lake	60.4602	-151.079	60	2013-08-07	sweep	female	adult
KNWR:Ento:8971	KNWR:Ento:8971	10.7299/X7WM1DJ2	10.7299/X7WM1DJ2	Soldotna, Headquarters Lake	60.4602	-151.079	60	2013-08-07	sweep	female	adult
KNWR:Ento:10326	KNWR:Ento:10326	10.7299/X7SN0931	10.7299/X7SN0931	Soldotna, Headquarters Lake	60.4652	-151.066	50	2013-08-08	sweep	female	adult
KNWR:Ento:8958	KNWR:Ento:8958	10.7299/X7M045K2	10.7299/X7M045K2	Soldotna, Headquarters Lake	60.4652	-151.066	9	2013-08-08	hand/aspirator		5th instar , 4th instar
KNWR:Ento:8972	KNWR:Ento:8972	10.7299/X7348KGX	10.7299/X7348KGX	Soldotna, Headquarters Lake	60.4652	-151.065	7	2013-08-09	hand/aspirator		5th instar , 4th instar , 3rd instar , 2nd instar
KNWR:Ento:10327	KNWR:Ento:10327	10.7299/X78P60NF	10.7299/X78P60NF	Soldotna, Headquarters Lake wetland	60.4652	-151.066	50	2013-08-13	sweep	female	adult
KNWR:Ento:8951	KNWR:Ento:8951	10.7299/X76Q1XD9	10.7299/X76Q1XD9	Soldotna, Headquarters Lake	60.4652	-151.066	10	2013-08-13	aspirator		5th instar , 4th instar , 3rd instar , exuvium
KNWR:Ento:8957	KNWR:Ento:8957	10.7299/X7CF9Q7D	10.7299/X7CF9Q7D	Soldotna, Headquarters Lake	60.4604	-151.078	7	2013-08-14	hand/aspirator	female	adult
KNWR:Ento:8964	KNWR:Ento:8964	10.7299/X7H70FXT	10.7299/X7H70FXT	Soldotna, Headquarters Lake	60.4641	-151.064	7	2013-08-19	hand/aspirator		4th instar , 5th instar
KNWR:Ento:8965	KNWR:Ento:8965	10.7299/X7154H6Q	10.7299/X7154H6Q	Soldotna, Headquarters Lake	60.4641	-151.064	7	2013-08-19	hand/aspirator	female	adult
KNWR:Ento:8966	KNWR:Ento:8966	10.7299/X70C4VWK	10.7299/X70C4VWK	Soldotna, Headquarters Lake	60.465	-151.065	50	2013-08-22	sweep	female	adult
KNWR:Ento:8967	KNWR:Ento:8967	10.7299/X7QN66X6	10.7299/X7QN66X6	Soldotna, Headquarters Lake	60.4652	-151.066	6	2013-08-22	hand/aspirator		5th instar
KNWR:Ento:8959	KNWR:Ento:8959	10.7299/X7QV3MNH	10.7299/X7QV3MNH	Soldotna, Headquarters Lake	60.4593	-151.077	80	2013-08-23	sweep	female	adult
KNWR:Ento:8963	KNWR:Ento:8963	10.7299/X7RV0NVS	10.7299/X7RV0NVS	Soldotna, Headquarters Lake	60.4592	-151.076	80	2013-08-27	sweep	female	adult
KNWR:Ento:8970	KNWR:Ento:8970	10.7299/X7VD6ZKN	10.7299/X7VD6ZKN	Soldotna, Headquarters Lake	60.4592	-151.076	7	2013-08-27	hand/aspirator		5th instar , 4th instar , 3rd instar
KNWR:Ento:8977	KNWR:Ento:8977	10.7299/X79K4BCH	10.7299/X79K4BCH	Soldotna, Headquarters Lake. Between 60.45924°N 151.07640°W and 60.46046°N 151.07678°W	60.4599	-151.077	80	2013-09-04	sweep	male	adult
KNWR:Ento:8978	KNWR:Ento:8978	10.7299/X77P8ZJ4	10.7299/X77P8ZJ4	Soldotna, Headquarters Lake	60.4592	-151.076	7	2013-09-04	hand/aspirator		5th instar , 4th instar , 3rd instar , 2nd instar , egg	The egg that ended up in the vial was either aspirated from moss or included in a small clump of moss that I had put in the vial.
KNWR:Ento:8984	KNWR:Ento:8984	10.7299/X7FB532S	10.7299/X7FB532S	Soldotna, Headquarters Lake	60.4592	-151.076	8	2013-09-12	Berlese		2nd instar
KNWR:Ento:8985	KNWR:Ento:8985	10.7299/X7PV6KGP	10.7299/X7PV6KGP	Soldotna, Headquarters Lake	60.4592	-151.076	8	2013-09-12	aspirator		5th instar , 4th instar , 3rd instar
KNWR:Ento:8989	KNWR:Ento:8989	10.7299/X7VM4CDP	10.7299/X7VM4CDP	Soldotna, Headquarters Lake	60.4593	-151.077	9	2013-09-20	Berlese		4th instar
KNWR:Ento:8990	KNWR:Ento:8990	10.7299/X72Z15PZ	10.7299/X72Z15PZ	Soldotna, Headquarters Lake	60.4593	-151.077	9	2013-09-20	hand/aspirator		4th instar , 5th instar , 3rd instar
KNWR:Ento:8991	KNWR:Ento:8991	10.7299/X7Z60P60	10.7299/X7Z60P60	Kasilof, Kasilof Beach Road	60.3899	-151.288	7	2013-09-26	aspirator		4th instar , 3rd instar
